# Supplementary material
Source: Springer Nature journal article supplement (https://www.springermedizin.de/resource/supplementary/12906_2012_1205_MOESM3_ESM.pdf/9520126)
Supplement: MOESM3 [file 9520126]

Table 3 Symptoms for which Kampo medicines are currently prescribed

| Symptoms                                | All (n=200) |      | Palliative care teams(n=149) |      | PCUs(n=46) |      | p-value | specialists(n=75) |      | non-specialists(n=125) |      | p-value |
|-----------------------------------------|-------------|------|------------------------------|------|------------|------|---------|-------------------|------|------------------------|------|---------|
|                                         | frequency   | %    | frequency                    | %    | frequency  | %    |         | frequency         | %    | frequency              | %    |         |
| Numbness/Hypesthesia                    | 99          | 49.5 | 86                           | 57.7 | 12         | 26.1 | 0.000   | 33                | 44.0 | 66                     | 52.8 | 0.245   |
| Constipation (not caused by opioid use) | 76          | 38   | 56                           | 37.6 | 20         | 43.5 | 0.182   | 27                | 36.0 | 49                     | 39.2 | 0.764   |
| Anorexia/Weight Loss                    | 72          | 36   | 60                           | 40.3 | 12         | 26.1 | 0.046   | 32                | 42.7 | 40                     | 32.0 | 0.171   |
| Muscle Cramp                            | 71          | 35.5 | 54                           | 36.2 | 17         | 37.0 | 0.279   | 33                | 44.0 | 38                     | 30.4 | 0.067   |
| Languor/Fatigue                         | 64          | 32   | 49                           | 32.9 | 14         | 30.4 | 0.818   | 23                | 30.7 | 41                     | 32.8 | 0.876   |
| Constipation (caused by opioid use)     | 48          | 24   | 37                           | 24.8 | 11         | 23.9 | 0.490   | 20                | 26.7 | 28                     | 22.4 | 0.608   |
| Abdominal Discomfort                    | 46          | 23   | 29                           | 19.5 | 16         | 34.8 | 0.088   | 13                | 17.3 | 33                     | 26.4 | 0.166   |
| Diarrhea                                | 45          | 22.5 | 39                           | 26.2 | 5          | 10.9 | 0.090   | 14                | 18.7 | 31                     | 24.8 | 0.383   |
| Delirium                                | 40          | 20   | 27                           | 18.1 | 13         | 28.3 | 0.155   | 18                | 24.0 | 22                     | 17.6 | 0.361   |
| Pain                                    | 38          | 19   | 35                           | 23.5 | 3          | 6.5  | 0.020   | 15                | 20.0 | 23                     | 18.4 | 0.853   |
| Edema (Local edema/Anasarca)            | 31          | 15.5 | 25                           | 16.8 | 6          | 13.0 | 0.546   | 12                | 16.0 | 19                     | 15.2 | 1.000   |
| Nausea/Vomiting (others)                | 27          | 13.5 | 22                           | 14.8 | 5          | 10.9 | 0.566   | 6                 | 8.0  | 21                     | 16.8 | 0.090   |
| Nausea/Vomiting (during chemotherapy)   | 22          | 11   | 22                           | 14.8 | 0          | 0.0  | 0.016   | 6                 | 8.0  | 16                     | 12.8 | 0.356   |
| Stomatitis/Xerostomia                   | 21          | 10.5 | 19                           | 12.8 | 2          | 4.3  | 0.216   | 11                | 14.7 | 10                     | 8.0  | 0.157   |
| Taste alteration                        | 20          | 10   | 17                           | 11.4 | 3          | 6.5  | 0.409   | 6                 | 8.0  | 14                     | 11.2 | 0.627   |
| Depression                              | 20          | 10   | 17                           | 11.4 | 3          | 6.5  | 0.409   | 5                 | 6.7  | 15                     | 12.0 | 0.330   |
| Nausea/Vomiting (caused by opioid use)  | 17          | 8.5  | 16                           | 10.7 | 1          | 2.2  | 0.129   | 6                 | 8.0  | 11                     | 8.8  | 1.000   |
| Adjustment Disorder                     | 15          | 7.5  | 12                           | 8.1  | 3          | 6.5  | 0.846   | 8                 | 10.7 | 7                      | 5.6  | 0.267   |
| Sleep disorder/Insomnia                 | 14          | 7    | 10                           | 6.7  | 4          | 8.7  | 0.823   | 5                 | 6.7  | 9                      | 7.2  | 1.000   |
| Others                                  | 13          | 6.5  | 6                            | 4.0  | 6          | 13.0 | 0.055   | 6                 | 8.0  | 7                      | 5.6  | 0.560   |
| Anemia                                  | 11          | 5.5  | 9                            | 6.0  | 2          | 4.3  | 0.805   | 4                 | 5.3  | 7                      | 5.6  | 1.000   |
| Dysphagia/Deglutition Disorder          | 10          | 5    | 9                            | 6.0  | 1          | 2.2  | 0.581   | 2                 | 2.7  | 8                      | 6.4  | 0.326   |
| Dyspnea/Breathlessness                  | 6           | 3    | 5                            | 3.4  | 1          | 2.2  | 1.000   | 2                 | 2.7  | 4                      | 3.2  | 1.000   |
| Muscle Weakness                         | 3           | 1.5  | 3                            | 2.0  | 0          | 0.0  | 0.614   | 2                 | 2.7  | 1                      | 0.8  | 0.557   |

\*Multiple answers allowed
